# Supplementary material for: Regulation of Arf activation occurs via distinct mechanisms at early and late Golgi compartments
Source: PubMed Central journal article supplement — Mol Biol Cell. 2017 Dec 1;28(25):3660–71. doi: 10.1091/mbc.E17-06-0370 (PMC5706993; doi:10.1091/mbc.e17-06-0370), 2017-12-01
Supplement: supp_E17-06-0370v1_CombinedSupMats.pdf [file supp_E17-06-0370v1_CombinedSupMats.pdf]

# Supplemental Materials

*Molecular Biology of the Cell*

Gustafson and Fromme

**Supplemental Table 1.** Yeast strains used in this study

| <b>Name</b>                      | <b>Description</b>                                                                                                                          | <b>Source</b>                |
|----------------------------------|---------------------------------------------------------------------------------------------------------------------------------------------|------------------------------|
| <b>SEY6210</b>                   | <i>MAT<math>\alpha</math> suc2-<math>\Delta</math>9 ura3-52 his3-<math>\Delta</math>200 leu2-3,112 lys2-801 trp1-<math>\Delta</math>901</i> | Robinson 1988 <sup>1</sup>   |
| <b>SEY6210.1</b>                 | <i>MAT<math>\alpha</math> suc2-<math>\Delta</math>9 ura3-52 his3-<math>\Delta</math>200 leu2-3,112 lys2-801 trp1-<math>\Delta</math>901</i> | Robinson 1988 <sup>1</sup>   |
| <b>BY4741<math>\alpha</math></b> | <i>MAT<math>\alpha</math> ura3-<math>\Delta</math>0 his3-<math>\Delta</math>1 leu2-<math>\Delta</math>0 lys2-<math>\Delta</math>0</i>       | Brachmann 1998 <sup>2</sup>  |
| <b>CFY578</b>                    | SEY6210 <i>Sec7-Mars::TRP1</i>                                                                                                              | Richardson 2016 <sup>3</sup> |
| <b>CFY2376</b>                   | SEY6210 <i>Sec7-Mars::TRP1 Gea1-mNeonGreen::HIS3</i>                                                                                        | This study                   |
| <b>CFY2378</b>                   | SEY6210 <i>Sec7-Mars::TRP1 Gea2-mNeonGreen::HIS3</i>                                                                                        | This study                   |
| <b>CFY2490</b>                   | SEY6210.1 <i>Gea1-3xMars::TRP1 GFP-Vrg4</i>                                                                                                 | This study                   |
| <b>CFY2503</b>                   | SEY6210.1 <i>Gea2-3xMars::TRP1 GFP-Vrg4</i>                                                                                                 | This study                   |
| <b>CFY2872</b>                   | BY4741 $\alpha$ <i>gea1<math>\Delta</math>::KanMX gea2<math>\Delta</math>::HIS3 +pCF1248</i>                                                | This study                   |
| <b>CFY2873</b>                   | BY4741 $\alpha$ <i>gea1<math>\Delta</math>::NatMX gea2<math>\Delta</math>::HIS3 arf1<math>\Delta</math>::KanMX +pCF1248</i>                 | This study                   |

| Name | Description | Vector | Source |
|------|-------------|--------|--------|
|------|-------------|--------|--------|

**Supplemental Table 2.** Plasmids used in this study

|                             |                                                                                              |             |                              |
|-----------------------------|----------------------------------------------------------------------------------------------|-------------|------------------------------|
| <b>pBCR314</b>              | Sec7(203-2009) with a cleavable His <sub>6</sub> tag                                         | pFastBacHT  | Richardson 2012 <sup>4</sup> |
| <b>pMG005</b>               | Gea2 FL (1-1459) with a cleavable His <sub>6</sub> tag                                       | pET28       | Richardson 2016 <sup>3</sup> |
| <b>pMG020</b>               | Gea2ΔHDS3 (1-1196) with a cleavable His <sub>6</sub> tag                                     | pET28       | Richardson 2016 <sup>3</sup> |
| <b>pCF1299</b>              | Gea2ΔC (1-782) with a cleavable His <sub>6</sub> tag                                         | pET28       | Richardson 2016 <sup>3</sup> |
| <b>pMG036</b>               | Gea2GEF (558-782) with a cleavable His <sub>6</sub> tag                                      | pET28       | This study                   |
| <b>pCF1163</b>              | Gea1 FL (1-1408) with a cleavable His <sub>6</sub> tag                                       | pET28       | Richardson 2012 <sup>4</sup> |
| <b>pArf1</b>                | Arf1                                                                                         | pET3        | Weiss 1989 <sup>5</sup>      |
| <b>pCF1053</b>              | Arf1ΔN17                                                                                     | pET28       | Richardson 2012 <sup>4</sup> |
| <b>pCF1184</b>              | Ar1                                                                                          | pET23       | McDonold 2014 <sup>6</sup>   |
| <b>pNMT1</b>                | Nmt1                                                                                         | pCYC        | Duronio 1990 <sup>7</sup>    |
| <b>Ypt1-His<sub>7</sub></b> | Ypt1 with C-terminal His <sub>7</sub> tag and cleavable N-terminal GST tag                   | pGEX-6P     | Gift from T. Bretscher       |
| <b>pCM14</b>                | Ypt6 with C-terminal His <sub>7</sub> tag and cleavable N-terminal GST tag                   | pGEX-6P     | McDonold 2014 <sup>6</sup>   |
| <b>pLT50</b>                | Full-length Ypt1 with cleavable N-terminal GST tag                                           | pGEX-6P     | Thomas 2016 <sup>8</sup>     |
| <b>pLT40</b>                | Gdi1 with cleavable N-terminal GST tag                                                       | pGEX-6P     | Thomas 2016 <sup>8</sup>     |
| <b>pLT35</b>                | Mrs6 with cleavable N-terminal His <sub>6</sub> tag                                          | pET28       | Thomas 2016 <sup>8</sup>     |
| <b>pLT41</b>                | Bet2 with cleavable N-terminal His <sub>6</sub> tag and Bet4                                 | pCDF-Duet-1 | Thomas 2016 <sup>8</sup>     |
| <b>pCM10</b>                | Gea1 FL (1-1408)-GFP driven by P <sub>G<sub>EA1</sub></sub>                                  | pRS415      | This study                   |
| <b>pCM09</b>                | Gea1ΔHDS3 (1-1225)-GFP driven by P <sub>G<sub>EA1</sub></sub>                                | pRS415      | This study                   |
| <b>pCF1312</b>              | Gea1ΔC (1-761)-GFP driven by P <sub>G<sub>EA1</sub></sub>                                    | pRS415      | This study                   |
| <b>pMG001</b>               | Gea2 FL (1-1459)-GFP driven by P <sub>G<sub>EA2</sub></sub>                                  | pRS415      | This study                   |
| <b>pMG002</b>               | Gea2ΔHDS3 (1-1196)-GFP driven by P <sub>G<sub>EA2</sub></sub>                                | pRS415      | This study                   |
| <b>pCF1313</b>              | Gea2ΔC (1-766)-GFP driven by P <sub>G<sub>EA2</sub></sub>                                    | pRS415      | This study                   |
| <b>pCF1301</b>              | Gea1-GFP driven by P <sub>G<sub>EA2</sub></sub>                                              | pRS415      | This study                   |
| <b>pCF1302</b>              | Gea2-GFP driven by P <sub>G<sub>EA1</sub></sub>                                              | pRS415      | This study                   |
| <b>pCF1248</b>              | Gea2 driven by P <sub>G<sub>EA2</sub></sub> (URA3 maintenance plasmid for shuffling strains) | pRS416      | This study                   |
| <b>pRC2100</b>              | GFP-Ypt1 driven by P <sub>YOP1</sub>                                                         | pRS415      | Gift from R. Collins         |
| <b>Ylplac211-iGFP-VRG4</b>  | Integrating plasmid for GFP-VRG4 by two-step gene replacement                                | Ylplac211   | Gift from B. Glick           |

**Supplemental Table 3.** Composition of liposomes used in this study

| Lipid          | PC                      | PC-Ni <sup>2+</sup> | TGN | TGN-Ni <sup>2+</sup> |
|----------------|-------------------------|---------------------|-----|----------------------|
|                | <i>Amount (Molar %)</i> |                     |     |                      |
| DOPC           | 99                      | 94                  | 24  | 24                   |
| POPC           |                         |                     | 6   | 6                    |
| DOPE           |                         |                     | 7   | 7                    |
| POPE           |                         |                     | 3   | 3                    |
| DOPS           |                         |                     | 1   | 1                    |
| POPS           |                         |                     | 2   | 2                    |
| DOPA           |                         |                     | 1   | 1                    |
| POPA           |                         |                     | 2   | 2                    |
| PI             |                         |                     | 29  | 24                   |
| PI(4)P         |                         |                     | 1   | 1                    |
| CDP-DAG        |                         |                     | 2   | 2                    |
| PO-DAG         |                         |                     | 4   | 4                    |
| DO-DAG         |                         |                     | 2   | 2                    |
| Ceramide (C18) |                         |                     | 5   | 5                    |
| Nickel-DOGS    |                         | 5                   |     | 5                    |
| Cholesterol    |                         |                     | 10  | 10                   |
| DiR            | 1                       | 1                   | 1   | 1                    |

## Supplemental References

1. Robinson, J. S., Klionsky, D. J., Banta, L. M. & Emr, S. D. Protein sorting in *Saccharomyces cerevisiae*: isolation of mutants defective in the delivery and processing of multiple vacuolar hydrolases. *Mol. Cell. Biol.***8**, 4936–48 (1988).
2. Brachmann, C. B. *et al.* Designer deletion strains derived from *Saccharomyces cerevisiae* S288C: A useful set of strains and plasmids for PCR-mediated gene disruption and other applications. *Yeast***14**, 115–132 (1998).
3. Richardson, B. C., Halaby, S. L., Gustafson, M. A. & Fromme, J. C. The Sec7 N-terminal regulatory domains facilitate membrane-proximal activation of the Arf1 GTPase. *Elife***5**, 1–20 (2016).
4. Richardson, B. C., McDonold, C. M. & Fromme, J. C. The Sec7 Arf-GEF Is Recruited to the trans-Golgi Network by Positive Feedback. *Dev. Cell***22**, 799–810 (2012).
5. Weiss, O., Holden, J., Rulka, C. & Kahn, R. A. Nucleotide Binding and Cofactor Activities of Purified Bovine Brain and Bacterially Expressed ADP-ribosylation Factor. *J. Biol. Chem.***264**, 21066–21072 (1989).
6. McDonold, C. M. & Fromme, J. C. Four GTPases Differentially Regulate the Sec7 Arf-GEF to Direct Traffic at the trans-Golgi Network. *Dev. Cell***30**, 759–767 (2014).
7. Duronio, R. J. *et al.* Protein N-myristoylation in *Escherichia coli*: Reconstitution of a eukaryotic protein modification in bacteria. *Proc. Natl. Acad. Sci. U. S. A.***87**, 1506–1510 (1990).
8. Thomas, L. L. & Fromme, J. C. GTPase cross talk regulates TRAPP II activation of Rab11 homologues during vesicle biogenesis. *J. Cell Biol.***215**, 499–513 (2016).

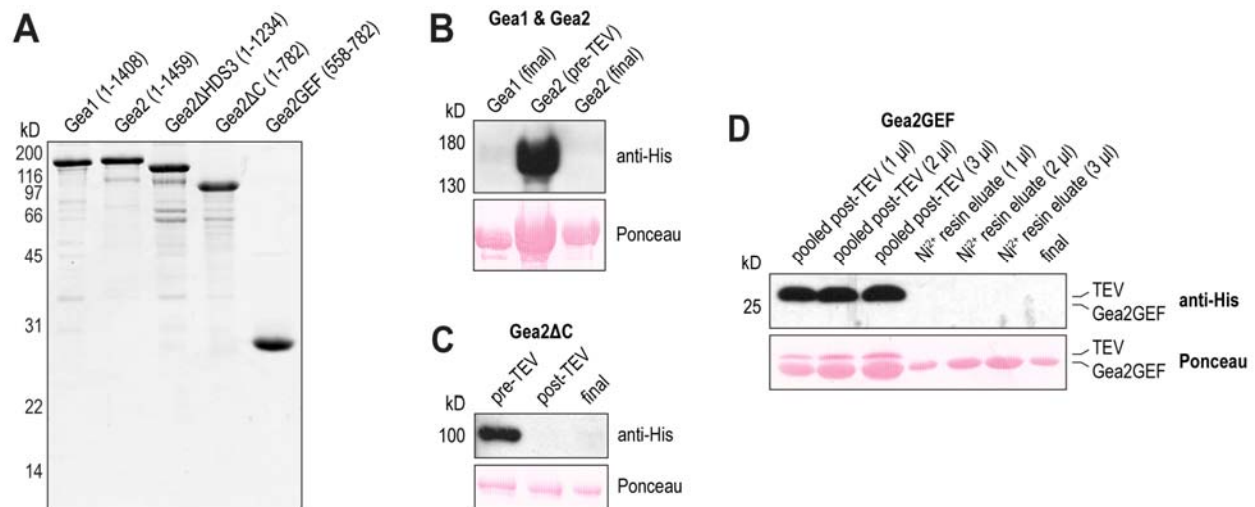

**Supplemental Figure 1. GEF constructs used for biochemistry are pure and His<sub>6</sub> tags were successfully cleaved.** (A) Equal masses of full length Gea1 and Gea2, Gea2ΔHDS3, Gea2ΔC, and Gea2GEF were separated on an 8% polyacrylamide gel and visualized by Coomassie staining. Western blots with anti-His antibody against (B) Gea2 before TEV cleavage of the His<sub>6</sub> tag and final reagent samples of Gea1 and Gea2, (C) Gea2ΔC before and after TEV cleavage of the His<sub>6</sub> tag, as well as the final Gea2ΔC reagent, and (D) dilutions of fractions of Gea2GEF pooled after TEV cleavage, after incubation with and elution from Ni-NTA resin, and the final Gea2GEF reagent. For all western blots, Ponceau stains reveal protein on the membrane. Note that TEV protease is His<sub>6</sub>-tagged.

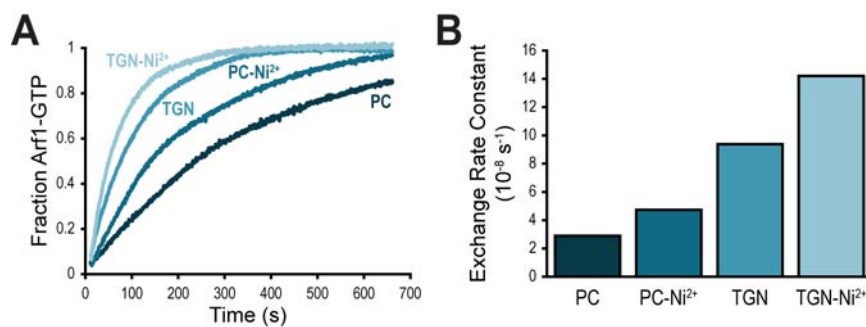

**Supplemental Figure 2. EDTA-induced Arf1 nucleotide exchange favors TGN over PC liposomes *in vitro*.** (A) Normalized traces showing EDTA exchange of Arf1 on PC, PC-Ni<sup>2+</sup>, TGN, and TGN-Ni<sup>2+</sup> liposomes. (B) Rates of Arf1 exchange determined from traces in (A).
